# Supplementary material for: Changes in markers for cardio-metabolic disease risk after only 1-2 weeks of a high saturated fat diet in overweight adults
Source: PubMed Central journal article supplement (PMC6021040; doi:10.1371/journal.pone.0198372), 2018-06-27
Supplement: pone.0198372.s001.pdf [file pone.0198372.s001.pdf]

**Supplemental Table 1** Proportion of specific fatty acid species measured in plasma, muscle triglycerides, and muscle phospholipid fractions

|                              | Plasma fatty acids |        | Muscle triglycerides |        | Muscle Phospholipids |        |
|------------------------------|--------------------|--------|----------------------|--------|----------------------|--------|
|                              | BEFORE             | AFTER  | BEFORE               | AFTER  | BEFORE               | AFTER  |
| <b>C14:0</b>                 | 2±1%               | 3±1%*  | 2±1%                 | 4±1%*  | <1%                  | <1%    |
| <b>C16:0</b>                 | 24±1%              | 27±1%* | 24±1%                | 27±1%* | 30±1%                | 29±1%* |
| <b>C18:0</b>                 | 8±1%               | 8±1%   | 6±1%                 | 6±1%   | 14±1%                | 13±1%* |
| <b>Total saturated</b>       | 35±1%              | 39±2%* | 32±1%                | 37±1%* | 44±1%                | 43±1%* |
| <b>C16:1</b>                 | 3±1%               | 3±1%   | 3±1%                 | 3±1%   | <1%                  | <1%    |
| <b>C18:1</b>                 | 42±1%              | 40±1%  | 48±1%                | 45±1%* | 9±1%                 | 9±1%   |
| <b>Total monounsaturated</b> | 47±1%              | 46±1%  | 50±1%                | 48±1%  | 10±1%                | 9±1%*  |
| <b>C18:2</b>                 | 15±1%              | 12±1%* | 17±1%                | 14±1%* | 36±1%                | 36±1%  |
| <b>C20:4</b>                 | 2±1%               | 2±1%   | <1%                  | <1%    | 10±1%                | 11±1%* |
| <b>Total polyunsaturated</b> | 18±1%              | 15±1%* | 18±1%                | 15±1%* | 46±1%                | 48±1%* |

Values are means±SE. \* Significantly different from BEFORE, P<0.05.

*Measurements of the following fatty acids represented <1% of the total fatty acid pool or were not detectible in plasma, muscle triglycerides, and muscle phospholipid fractions: C12:0, C20:0, C22:0, C14:1, C20:1, C22:1, C18:3, C20:2, C20:3, C20:5, and C22:6*
